# Supplementary material for: Chitosan films containing mesoporous SBA-15 supported silver nanoparticles for wound dressing
Source: Royal Society of Chemistry journal article supplement (doi:10.1039/c4tb00927d), 2014-07-02
Supplement: c4tb00927d1.pdf [file c4tb00927d1.pdf]

# Supporting Information

## **Chitosan films containing mesoporous SBA-15 supported silver nanoparticles for wound dressing**

Valeria Ambrogi<sup>†\*</sup>, Anna Donnadio<sup>‡</sup>, Donatella Pietrella<sup>†</sup>, Loredana Latterini<sup>‡</sup>, Federica Alunni Proietti<sup>†</sup>, Fabio Marmottini<sup>‡</sup>, Giuseppina Padeletti<sup>§</sup>, Saulius Kaciulis<sup>§</sup>, Stefano Giovagnoli<sup>†</sup>, Maurizio Ricci<sup>†</sup>

<sup>†</sup> Dipartimento di Scienze Farmaceutiche, Università degli Studi di Perugia, Via del Liceo 1, 06123 Perugia, Italy. E-mail: [valeria.ambrogi@unipg.it](mailto:valeria.ambrogi@unipg.it), Tel.: +39 755855125; fax: +39 0755855125.

<sup>‡</sup> Dipartimento di Chimica, Biologia e Biotecnologie, Università degli Studi di Perugia, Via Elce di Sotto, 8, 06123 Perugia, Italy.

<sup>§</sup> Istituto per lo Studio dei Materiali Nanostrutturati (ISMN) – CNR, Area della Ricerca Roma 1, Via Salaria Km 29.3, 00015, Monterotondo Stazione (Rome), Italy.

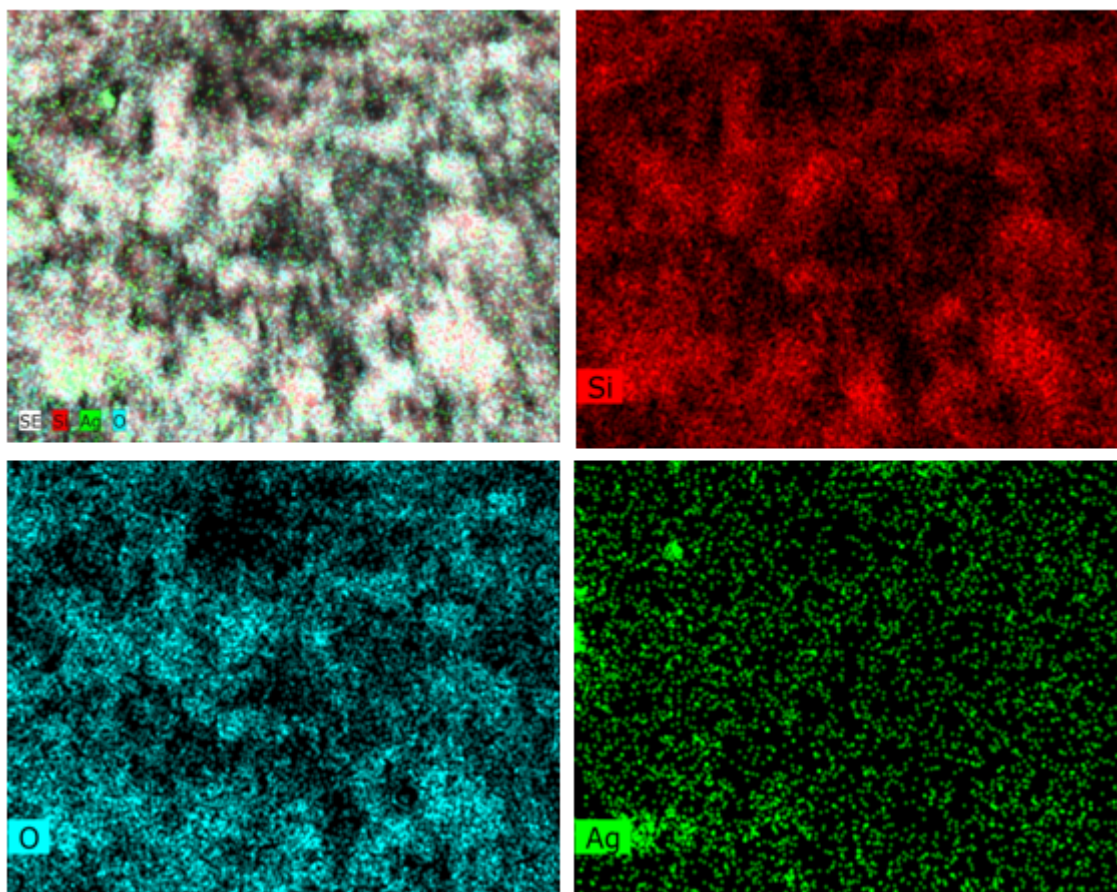

**Fig. S1** EDS images of Si, O and Ag in SBA-15-Ag.

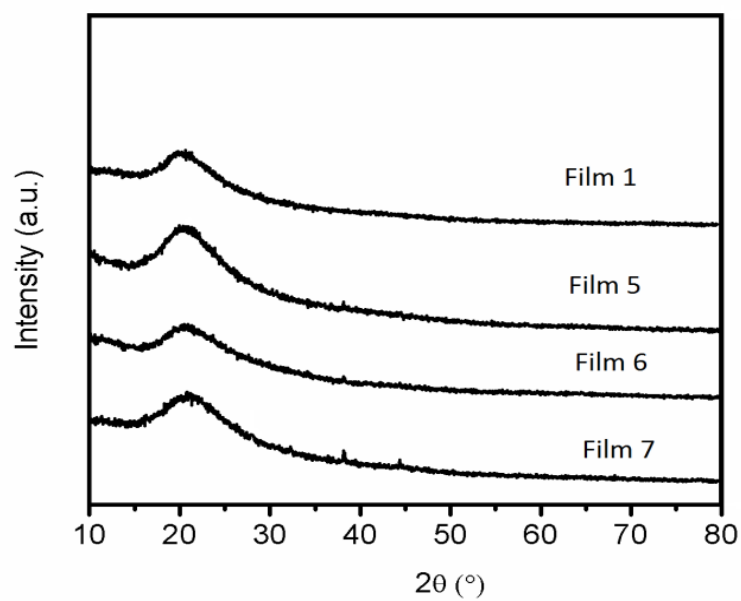

**Fig. S2** XRD patterns of chitosan film (film 1) and SBA-15-Ag chitosan films at different SBA-15-Ag concentrations (film 5-7).

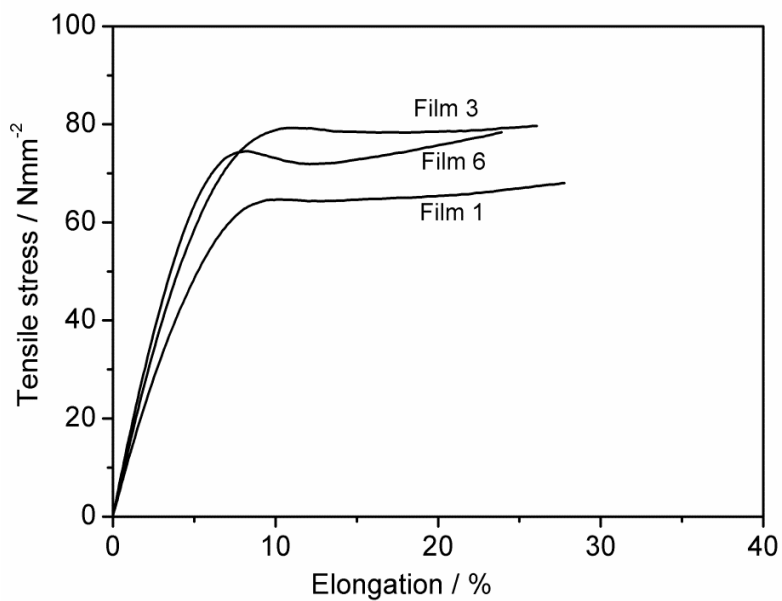

**Fig. S3** Stress - strain curves for chitosan and composite films containing 10wt% filler.

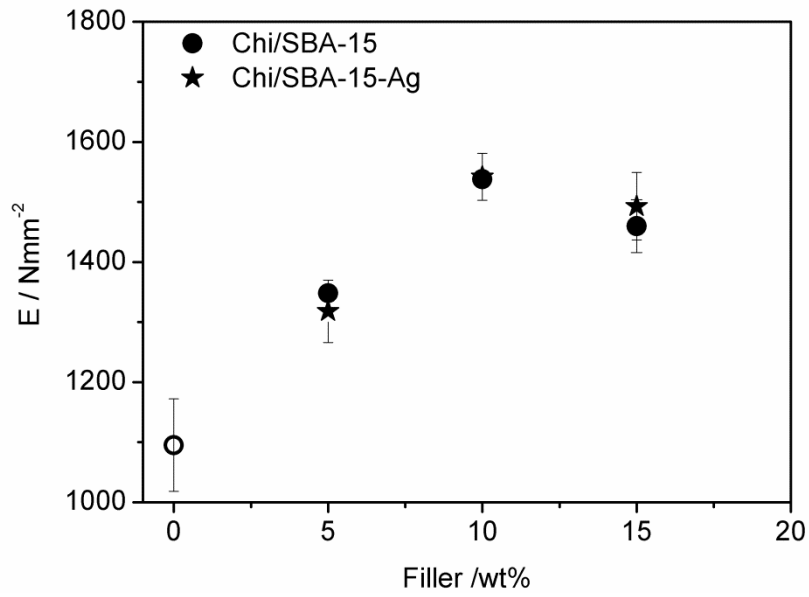

**Fig. S4** Young's modulus vs. SBA-15 and SBA-15-Ag mass fraction .

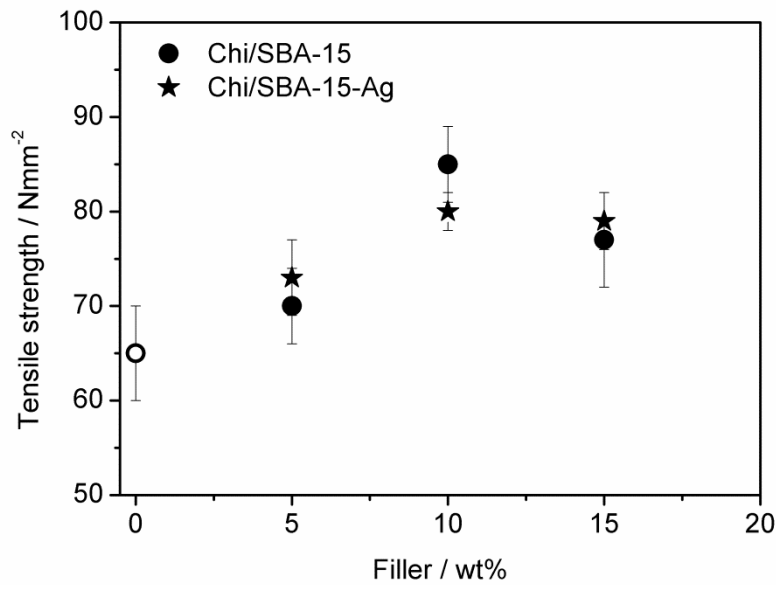

**Fig. S5** Tensile strength vs. SBA-15 and SBA-15-Ag mass fraction.

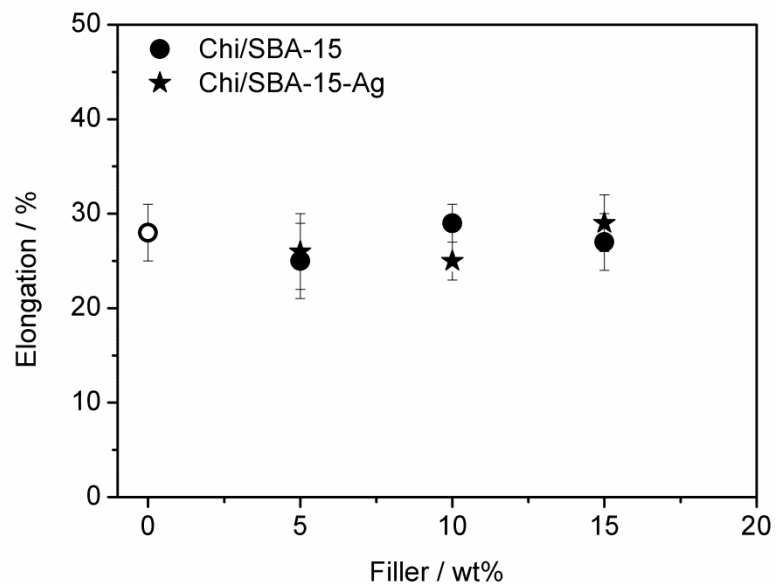

**Fig. S6** Elongation vs. SBA-15 and SBA-15-Ag mass fraction.

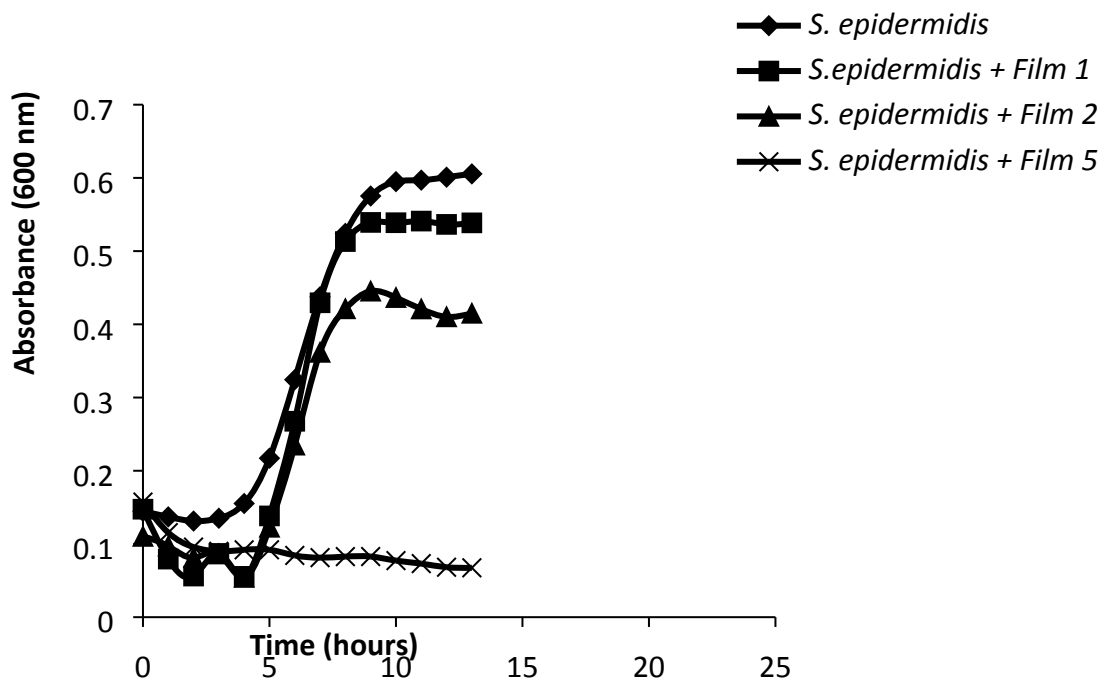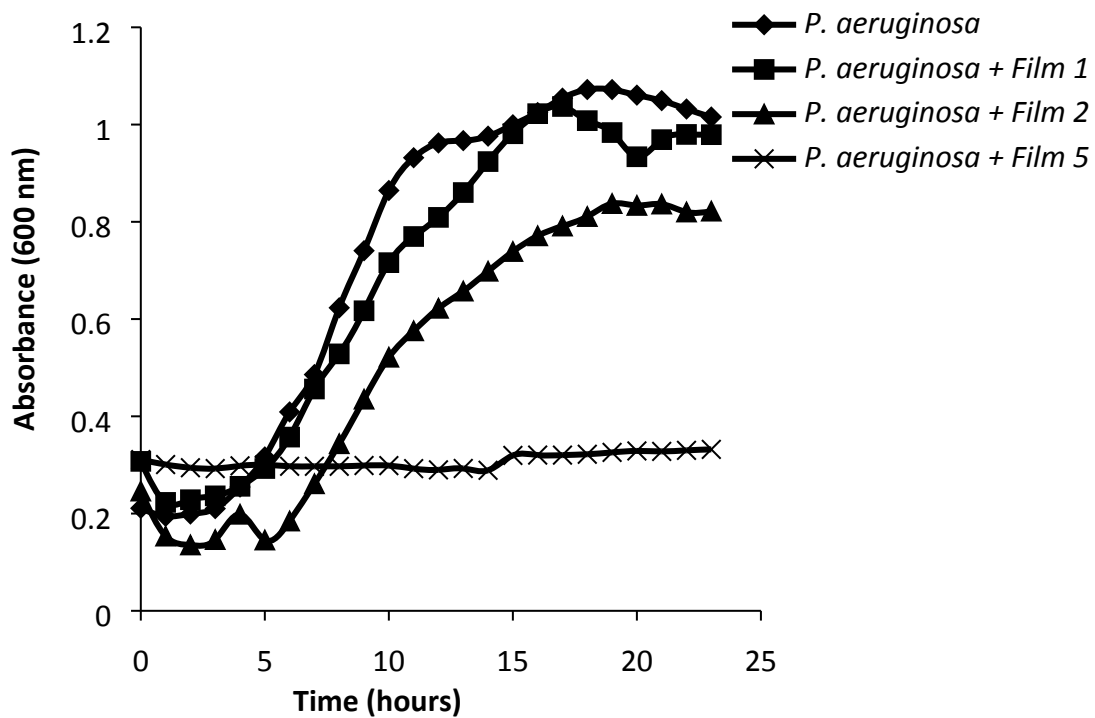

**Fig. S7** Growth curve of *S. epidermidis* and *P. aeruginosa* in presence of Film 1, Film 2 and Film 5. Results are expressed as mean of three different evaluations.

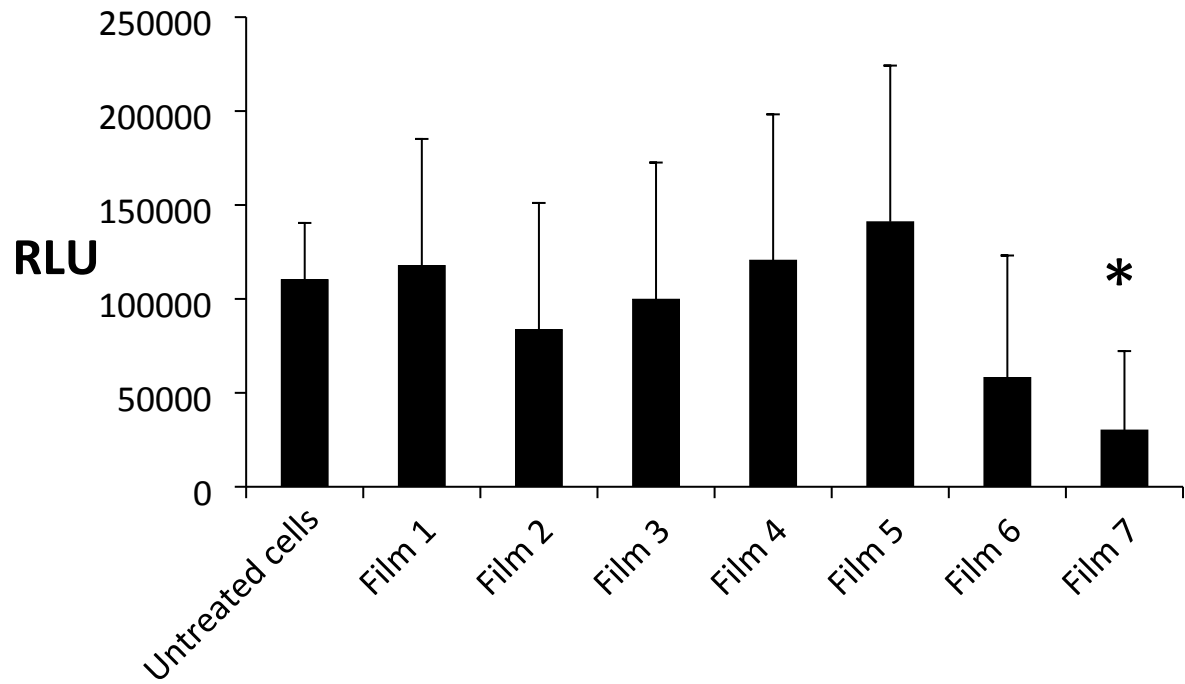

**Fig. S8** Cell viability of human skin keratinocytes NCTC 2544 after 24h of incubation with the indicated films. Results are expressed as mean $\pm$ SD of six evaluations performed in two different experiments. \**P*-values of  $< 0.05$  were considered significant (t-test).
